# Supplementary material for: Magnetocaloric properties of TbN, DyN and HoN nanopowders prepared by the plasma arc discharge method
Source: Royal Society of Chemistry journal article supplement (doi:10.1039/c5dt03528g), 2015-01-01
Supplement: c5dt03528g1.pdf [file c5dt03528g1.pdf]

Supporting Information

**Magnetocaloric properties of DyN, TbN and HoN nanopowders prepared by the  
plasma arc discharge**

K.P.Shinde<sup>1</sup>, S.H.Jang<sup>1</sup>, J.W. Kim, D.S. Kim, M. Ranot<sup>1</sup> and K.C.Chung<sup>1,\*</sup>

<sup>1</sup>Powder & Ceramics Division, Korea Institute of Materials Science, Changwon, Republic of Korea

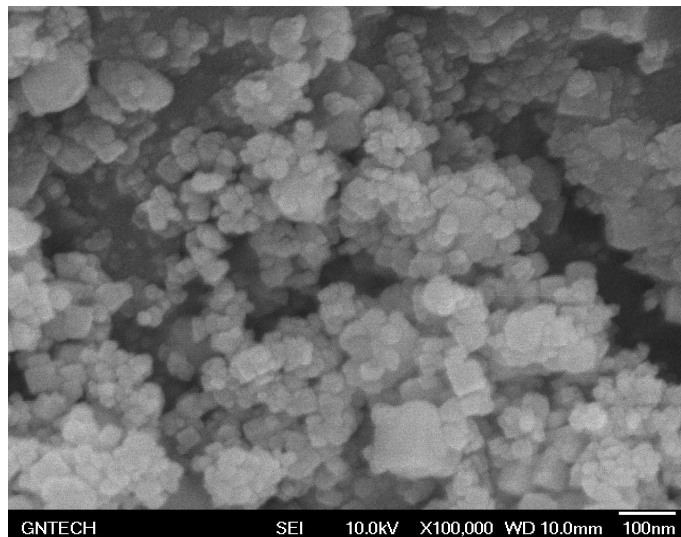

Fig.S1 SEM image of DyN nanopowder

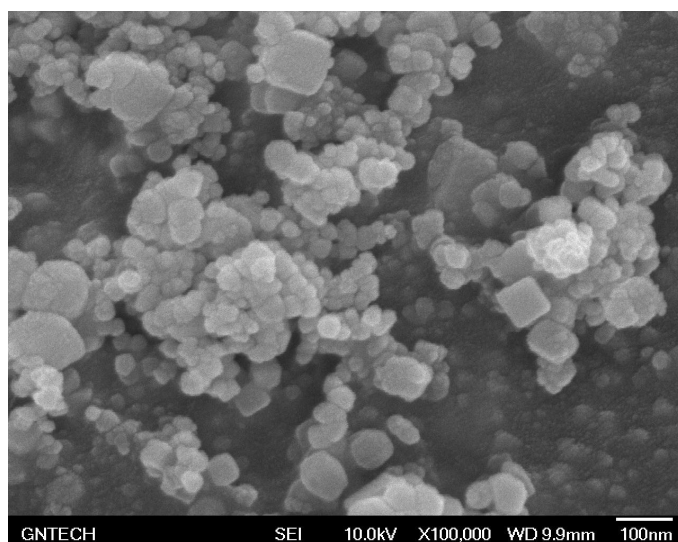

Fig.S2 SEM image of TbN nanopowder

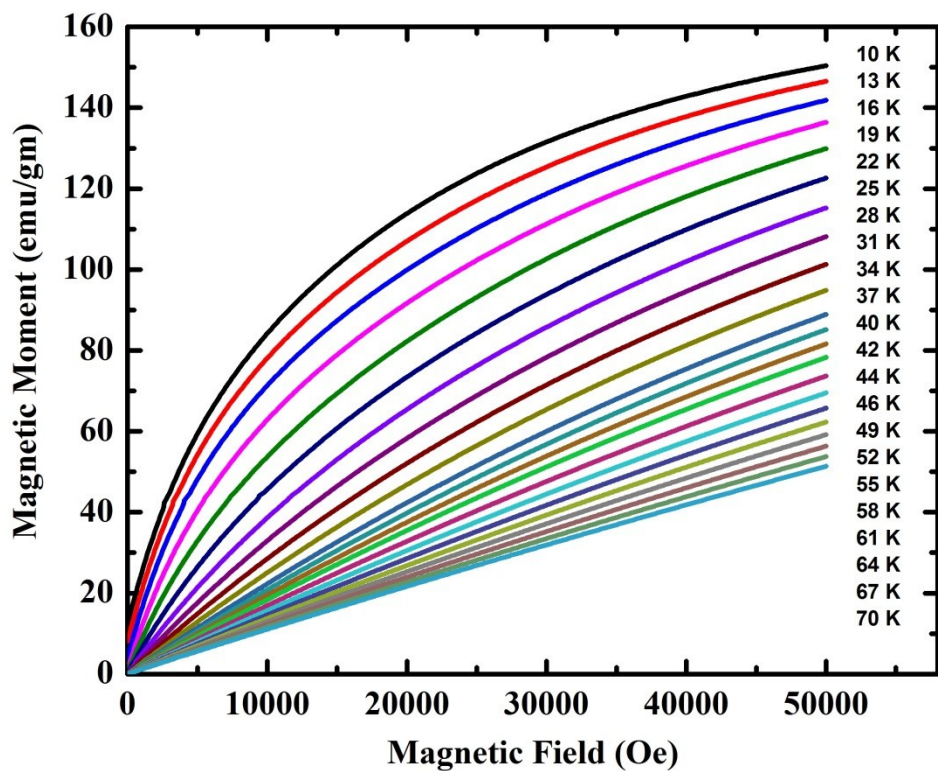

Fig.S3 Magnetization isotherms (M-H) measured at various applied fields from 0-5 T at different temperatures around  $T_C$  for DyN.

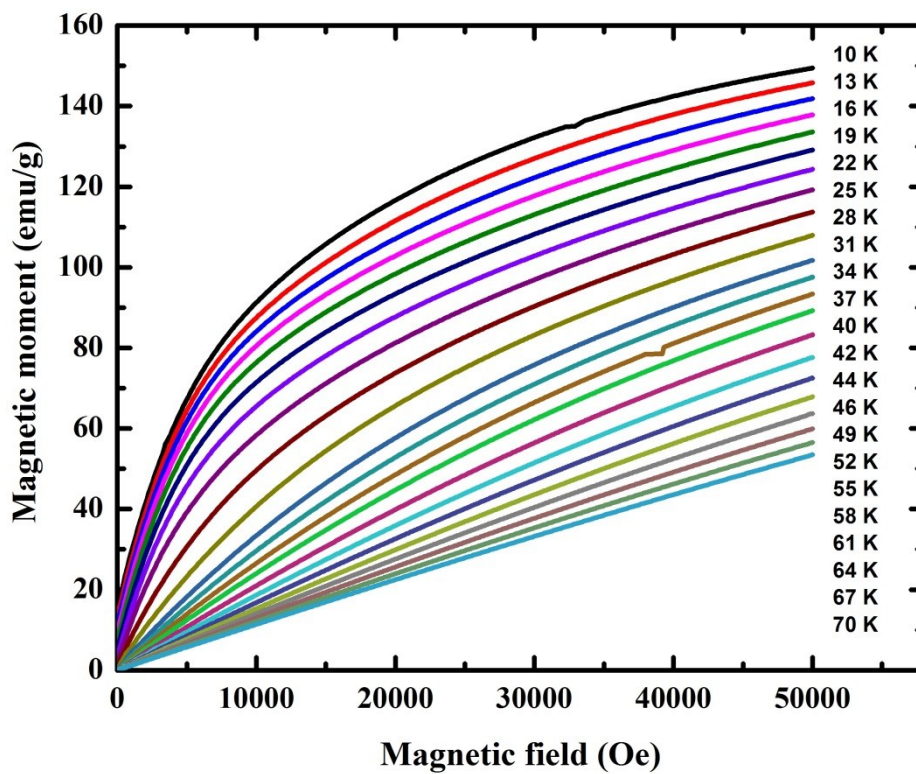

Fig.S4 Magnetization isotherms (M-H) measured at various applied fields from 0-5 T at different temperatures around  $T_C$  for DyN.

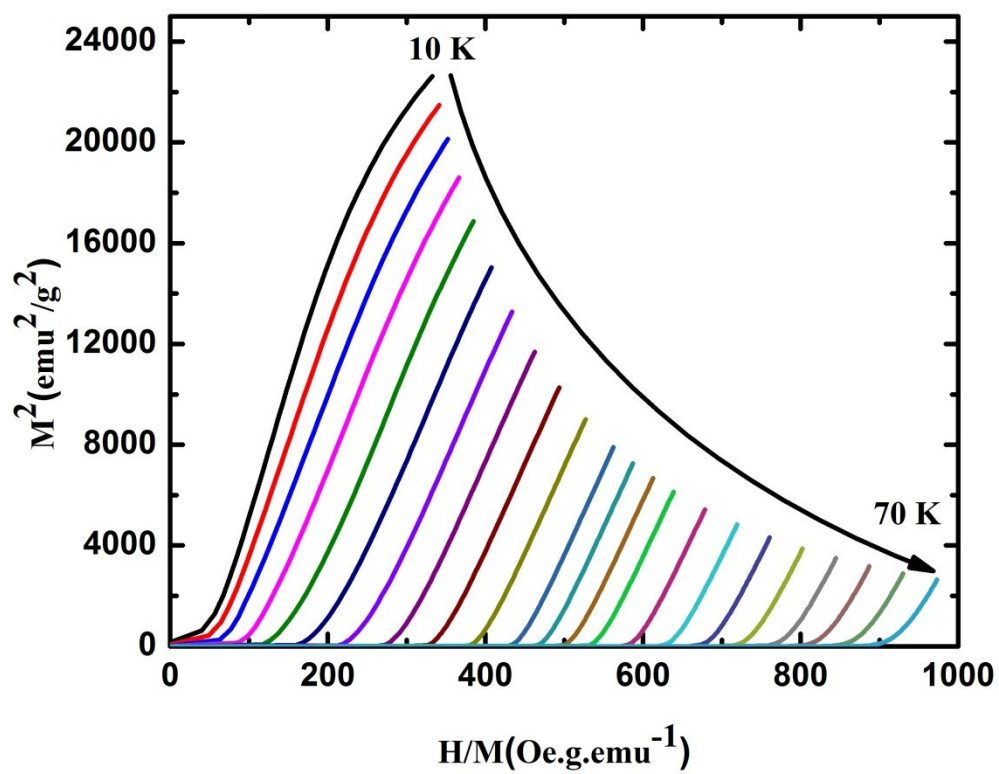

Fig. S5 Arrott plots of  $M^2$  vs  $H/M$  at the various temperatures for DyN.

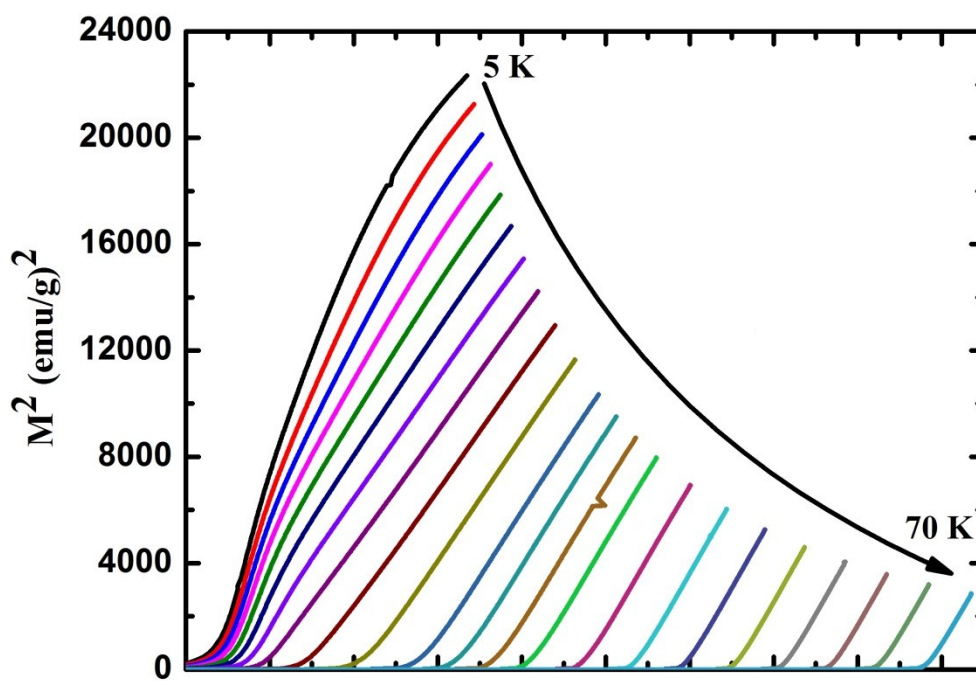

Fig. S6 Arrott plots of  $M^2$  vs  $H/M$  at the various temperatures for TbN.
